# Supplementary material for: Do 6-9-Year-Old Children in Denmark Adhere to National Dietary Recommendations and Are There Sociodemographic Disparities? The Generation Healthy Kids Study
Source: Research Square preprint supplement (doi:10.21203/rs.3.rs-7741373/v1), 2025-10-16
Supplement: Supplementary file 1 [file f5355ec68c8468a1013469e8.docx]

Supplementary files

Do 6-9-Year-Old Children in Denmark Adhere to National Dietary Recommendations and Are There Sociodemographic Disparities? The Generation Healthy Kids Study

European Journal of Nutrition

**Authors**

Frederik Holmegaard1†, Anna Gro Eilersen1†, Lotte Lauritzen1, Christian Mølgaard1, Ming Rong Liu2, Ken D. Stark2, Rikard Landberg3, Rikke Fredenslund Krølner4, Ulla Toft5, Camilla Trab Damsgaard1

†These authors contributed equally to this paper and share first authorship.

**Affiliations**

1Department of Nutrition, Exercise and Sports, Faculty of Science, University of Copenhagen, Frederiksberg, Denmark

2Department of Kinesiology and Health Sciences, University of Waterloo, Waterloo, ON, Canada

3Department of Life Sciences, Chalmers University of Technology, Gothenburg, Sweden

4National Institute of Public Health, University of Southern Denmark, Copenhagen, Denmark

5Department of Prevention, Health Promotion and Community Care, Steno Diabetes Center Copenhagen, Herlev, Denmark

**Corresponding author**

Frederik Holmegaard, E-mail: [fhj@nexs.ku.dk](mailto:fhj@nexs.ku.dk)

| **Supplementary table 1.** Dietary intake of all participants (n=1094) and nutrient biomarkers (n=317-342) | | | | | | |
| --- | --- | --- | --- | --- | --- | --- |
|  | Boys |  | Girls |  | Total |  |
| **Energy and macronutrient intake** |  |  |  |  |  |  |
| Energy, MJ/d | 7.0 ± 1.7 |  | 6.1 ± 1.6*** |  | 6.6 ± 1.7 |  |
| Carbohydrates, E% | 50.1 ± 5.6 |  | 50.6 ± 6.1 |  | 50.3 ± 5.9 |  |
| Dietary fiber, g/MJ | 2.7 ± 0.7 |  | 2.7 ± 0.7 |  | 2.7 ± 0.7 |  |
| Added sugar, E% | 7.9 (5.0-11.2) |  | 8.7 (5.3-12.0) |  | 8.2 (5.2-11.5) |  |
| Fat, E% | 32.5 ± 5.4 |  | 32.2 ± 5.3 |  | 32.4 ± 5.4 |  |
| SFA, E% | 11.1 ± 2.7 |  | 11.1 ± 2.7 |  | 11.1 ± 2.7 |  |
| Monounsaturated fat, E% | 11.0 ± 2.7 |  | 10.7 ± 2.5 |  | 10.9 ± 2.6 |  |
| Polyunsaturated fat, E% | 5.5 ± 1.4 |  | 5.4 ± 1.4 |  | 5.4 ± 1.4 |  |
| Protein, E% | 15.2 ± 3.0 |  | 15.0 ± 3.1 |  | 15.1 ± 3.1 |  |
|  |  |  |  |  |  |  |
| **Intake of food groups** |  |  |  |  |  |  |
| Fruit and vegetables, g/d | 204 (123-320) |  | 218 (135-306) |  | 211 (129-313) |  |
| Wholegrains, g/d | 52 (31-75) |  | 38 (21-60)*** |  | 44 (26-68) |  |
| Fisha, g/d | 12 (6-19) |  | 12 (6-19) |  | 12 (6-19) |  |
| Oily fisha, g/d | 4 (0-8) |  | 4 (1-7) |  | 4 (1-8) |  |
| Milk and dairy products, g/d | 202 (106-346) |  | 176 (83-299)** |  | 197 (90-318) |  |
| Meat and meat products, g/d | 78 (47-119) |  | 63 (40-97)*** |  | 71 (43-109) |  |
|  |  |  |  |  |  |  |
| **Micronutrient intake** |  |  |  |  |  |  |
| n-3 LCPUFA (mg/d) | 107 (36-219) |  | 108 (39-206) |  | 108 (36-215) |  |
| Iron (mg/d) | 7.4 ± 2.2 |  | 6.4 ± 2.0*** |  | 6.9 ± 2.2 |  |
|  |  |  |  |  |  |  |
| **Food and nutrient biomarkers** |  |  |  |  |  |  |
| Plasma alkylresorcinolsb, nmol/L | 270 (160-444) |  | 234 (163-369) |  | 250 (163-409) |  |
| Whole blood EPA+DHAc, FA% | 3.2 ± 0.8 |  | 3.3 ± 0.8 |  | 3.3 ± 0.8 |  |
| Serum ferritind, µg/L | 28 (21-39) |  | 28 (21-41) |  | 28 (21-39) |  |
| Hemoglobine, mmol/L | 8.1 ± 0.5 |  | 8.1 ± 0.5 |  | 8.1 ± 0.5 |  |
| Data are presented as mean±SD and median (IQR), when data were normally distributed and skewed, respectively.  **P<0.01, ***P<0.001 for differences between boys and girls  aData from FFQ where n=960,  bn=317,  cn=326,  dn=342,  en=334 | | | | | | |

| **Supplementary table 2.** Children’s adherence to dietary recommendations (n=1094) | | | | | | | |
| --- | --- | --- | --- | --- | --- | --- | --- |
| Food group or nutrient |  | Danish FBDG or NNR2023 |  | Daily intake |  | Adherence, n (%) |  |
| Fruit and vegetables, g/10 MJ |  | ≥600 g/10 MJ |  | 325 (196-484) |  | 145 (13.3) |  |
| Wholegrains, g/10 MJ |  | ≥75 g/10 MJ |  | 70 (41-102) |  | 501 (45.8) |  |
| Fisha, g/d |  | ≥35 g/d (Min. 231 g/w)c |  | 12 (6-19) |  | 72 (7.6) |  |
| Oily fisha, g/d |  | ≥20 g/d (Min. 132 g/w)c |  | 3.9 (0.7-7.6) |  | 66 (6.9) |  |
| Milk and dairy products, g/d |  | ≥250 g/d |  | 197 (90-318) |  | 406 (37.1) |  |
| Meat and meat products, g/10 MJ |  | ≤50 g/10 MJ (Max. 350 g/w) |  | 110 (70-163) |  | 164 (15.0) |  |
|  |  |  |  |  |  |  |  |
| SFA, E% |  | <10 E% |  | 11.1 ± 2.7 |  | 382 (34.9) |  |
| Dietary fiber, g/MJ |  | ≥2 g/MJ |  | 2.7±0.7 |  | 900 (82.3) |  |
| Added sugar, E% |  | <10 E% |  | 8.2 (5.2-11.5) |  | 717 (65.5) |  |
| Iron, mg/d |  | ≥8 mg/d |  | 6.9 ± 2.2 |  | 302 (27.6) |  |
| Vit D supplement during winterb |  | Supplement during winter (Oct-Apr) |  | 595 yes, 372 no |  | 595 (61.5) |  |
| Daily intakes are presented as median (IQR), mean±SD, and n when data were skewed, normally distributed, and binomial respectively.  aData was derived from the FFQ where n=780.  bData was derived from supplements’ questionnaire where n=794  cThe recommendation was recalculated to match the average energy intake of the included children. | | | | | | | |

| **Supplementary table 3.** Associations between sociodemographic characteristics and dietary intake among all participants with complete information on parental education and ethnic origin (n=1001) | | | | | | | | | | | | | | | | | | | | | | | | | | | | | | | | |
| --- | --- | --- | --- | --- | --- | --- | --- | --- | --- | --- | --- | --- | --- | --- | --- | --- | --- | --- | --- | --- | --- | --- | --- | --- | --- | --- | --- | --- | --- | --- | --- | --- |
|  | Fruit and vegetables, g/ 10 MJ | | |  | Wholegrains, g/10 MJ | | |  | Fisha, g/d | | |  | Milk and dairy, g/10 MJ | | |  | Meat and meat products, g/10 MJ | | |  | Added sugar, E% | | |  | SFA, E% | | |  | Adherence score | | |  | |
|  | β  (95% CI) | | P |  | β  (95% CI) | | P |  | β  (95% CI) | | P |  | β  (95% CI) | | P |  | β  (95% CI) | | P |  | β  (95% CI) | | P |  | β  (95% CI) | | P |  | β  (95% CI) | | P |  | |
| **Sex** |  |  |  |  |  |  |  |  |  |  |  |  |  |  |  |  |  |  |  |  |  |  |  |  |  |  |  |  |  |  |  |  | |
| Girls | Ref. | | <0.001 |  | Ref. | | <0.001 |  | Ref. | | 0.987 |  | Ref. | | 0.724 |  | Ref. | | 0.031 |  | Ref. | | 0.021 |  | Ref. | | 0.579 |  | Ref. | | 0.653 |  | |
| Boys | -57.6  (-84.0, -31.2) | |  | 10.4  (4.9, 16.0) | |  | 0.0  (-2.0, 2.0) | |  | -5.4  (-27.1, 37.8) | |  | 9.8  (0.9, 18.7) | |  | -0.7  (-1.3, -0.1) | |  | -0.1  (-0.4, 0.2) | |  | 0.0  (-0.1, 0.1) | |  | |
|  |  | |  |  |  | |  |  |  | |  |  |  | |  |  |  | |  |  |  | |  |  |  | |  |  |  | |  |  | |
| **Age, y** | -29.0  (-51.3, -6.7) | | 0.011 |  | -2.9  (-7.6, 1.8) | | 0.225 |  | -1.8  (-3.5, -0.2) | | 0.032 |  | -59.2  (-86.6, 31.7) | | <0.001 |  | 4.3  (-3.2, 11.8) | | 0.264 |  | 0.2  (-0.3, 0.7) | | 0.411 |  | -0.1  (-0.4, 0.2) | | 0.539 |  | -0.2  (-0.3, -0.1) | | <0.001 |  | |
| **Weight status** |  |  |  |  |  | |  |  |  | |  |  |  | |  |  |  | |  |  |  | |  |  |  | |  |  |  |  |  |  | |
| Underweight | 5.6  (-49.7, 60.9) | | 0.894 |  | 7.8  (-3.9, 19.5) | | 0.284 |  | 2.6  (-1.7, 6.9) | | 0.284 |  | 18.9  (-49.2, 86.9) | | 0.810 |  | -18.6  (-37.2, 0.1) | | 0.026 |  | -0.4  (-1.6, 0.9) | | 0.065 |  | 0.3  (-0.4, 1.0) | | 0.060 |  | 0.1  (-0.1, 0.3) | | 0.474 |  | |
| Normal weight | Ref. | |  | Ref. | |  | Ref. | |  | Ref. | |  | Ref. | |  | Ref. | |  | Ref. | |  | Ref. | |  | |
| Overweight | -7.9  (-56.0, 40.2) | |  | -0.8  (-11.0, 9.4) | |  | 1.3  (-2.3, 5.0) | |  | -0.1  (-59.3, 59.1) | |  | 7.8  (-8.4, 24.0) | |  | -1.1  (-2.2, 0.0) | |  | -0.5  (-1.1, 0.1) | |  | -0.1  (-0.2, 0.1) | |  | |
| **Parental education** | |  |  |  |  |  |  |  |  |  |  |  |  |  |  |  |  |  |  |  |  |  |  |  |  |  |  |  |  |  |  |  | |
| Long | Ref. | | 0.144 |  | Ref. | | 0.007 |  | Ref. | | 0.036 |  | Ref. | | 0.743 |  | Ref. | | 0.064 |  | Ref. | | 0.314 |  | Ref. | | 0.826 |  | Ref. | | <0.001 |  | |
| Medium | -26.0  (-61.4, 9.4) | |  | -6.4  (-13.9, 1.1) | |  | -2.6  (-5.3, 0.1) | |  | 3.8  (-39.7, 47.4) | |  | 9.8  (-2.1, 21.8) | |  | 0.5  (-0.3, 1.3) | |  | -0.1  (-0.5, 0.4) | |  | -0.2  (-0.3, -0.1) | |  | |
| Short | -33.8  (-81.9, 14.3) | |  | -13.5  (-23.7, -3.3) | |  | -3.3  (-7.0, 0.4) | |  | 19.1  (-40.0, 78.3) | |  | 14.3  (-1.9, 30.5) | |  | 0.5  (-0.6, 1.6) | |  | 0.1  (-0.5, 0.7) | |  | -0.3  (-0.5, -0.1) | |  | |
| **Origin** |  |  |  |  |  |  |  |  |  |  |  |  |  |  |  |  |  |  |  |  |  |  |  |  |  |  |  |  |  |  |  |  | |
| Danish | Ref. | | 0.766 |  | Ref. | | <0.001 |  | Ref. | | 0.763 |  | Ref. | | 0.162 |  | Ref. | | 0.862 |  | Ref. | | <0.001 |  | Ref. | | 0.013 |  | Ref. | | 0.353 |  | |
| Non-Danish | 7.3  (-41.0, 55.6) | |  | -27.8  (-38.0, -17.6) | |  | 0.6  (-3.1, 4.3) | |  | 42.3  (-17.1, 101.8) | |  | -1.4  (-17.7, 14.8) | |  | -2.6  (-3.7, -1.5) | |  | 0.8  (0.2,1.4) | |  | -0.1  (-0.3, 0.1) | |  | |
| **Residential area** |  |  |  |  |  |  |  |  |  |  |  |  |  |  |  |  |  |  |  |  |  |  |  |  |  |  |  |  |  |  |  |  | |
| Urban | Ref. | | <0.001 |  | Ref. | | 0.020 |  | Ref. | | 0.349 |  | Ref. | | 0.333 |  | Ref. | | 0.162 |  | Ref. | | 0.001 |  | Ref. | | 0.014 |  | Ref. | | 0.245 |  | |
| Rural | -50.5  (-78.5, -22.5) | |  | 7.1  (1.1, 13.0) | |  | -1.0  (-3.1, 1.1) | |  | 17.0  (-17.5, 51.5) | |  | 6.7  (-2.7, 16.2) | |  | 1.1  (0.4, 1.7) | |  | 0.4  (0.1, 0.8) | |  | -0.1  (-0.2, 0.0) | |  | |
| Regression coefficients (β), 95% confidence intervals (CI), and *P*-values were derived from multivariable linear regression models examining the independent associations of sex, age, weight status, parental education level, country of origin, and residential area with intake of selected food groups and nutrients, as well as an overall dietary adherence score. aFish intake data were derived from the food frequency questionnaire, n=994 | | | | | | | | | | | | | | | | | | | | | | | | | | | | | | | | |

| **Supplementary table 4.** Associations between sociodemographic characteristics and dietary intake among all participants (n=1094) | | | | | | | | | | | | | | | | | | | | | | | | | | | | | | | | | |
| --- | --- | --- | --- | --- | --- | --- | --- | --- | --- | --- | --- | --- | --- | --- | --- | --- | --- | --- | --- | --- | --- | --- | --- | --- | --- | --- | --- | --- | --- | --- | --- | --- | --- |
|  | Fruit and vegetables, g/ 10 MJ | | |  | Wholegrains, g/10 MJ | | |  | Fisha, g/d | | |  | Milk and dairy, g/10 MJ | | |  | Meat and meat products, g/10 MJ | | |  | Added sugar, E% | | |  | SFA, E% | | |  | | Adherence score | | |  |
|  | β  (95% CI) | | P |  | β  (95% CI) | | P |  | β  (95% CI) | | P |  | β  (95% CI) | | P |  | β  (95% CI) | | P |  | β  (95% CI) | | P |  | β  (95% CI) | | P |  | β  (95% CI) | | | P |  |
| **Sex** |  |  |  |  |  |  |  |  |  |  |  |  |  |  |  |  |  |  |  |  |  |  |  |  |  |  |  |  |  | |  |  |  |
| Girls | Ref. | | <0.001 |  | Ref. | | <0.001 |  | Ref. | | 0.943 |  | Ref. | | 0.969 |  | Ref. | | 0.018 |  | Ref. | | 0.067 |  | Ref. | | 0.973 |  | Ref. | | | 0.762 |  |
| Boys | -55.1  (-80.4, -29.7) | |  | 11.6  (6.2, 17.1) | |  | -0.1  (-2.1, 1.9) | |  | 0.6  (-30.6, 31.9) | |  | 10.3  (1.7, 18.9) | |  | -0.5  (-1.1, 0.0) | |  | 0.0  (-0.3, 0.3) | |  | 0.0  (-0.1, 0.1) | | |  |
|  |  |  |  |  |  |  |  |  |  |  |  |  |  |  |  |  |  |  |  |  |  |  |  |  |  |  |  |  |  | |  |  |  |
| **Age, y** | -24.8  (-46.4, -3.3) | | 0.024 |  | -3.2  (-7.9, 1.4) | | 0.173 |  | -1.9  (-3.5, -0.2) | | 0.031 |  | -61.6  (-88.1, -35.0) | | <0.001 |  | 4.4  (-2.9, 11.7) | | 0.232 |  | 0.4  (-0.1, 0.9) | | 0.108 |  | -0.1  (-0.4, 0.1) | | 0.358 |  | -0.2  (-0.3, -0.1) | | | <0.001 |  |
| **Weight status** |  |  |  |  |  |  |  |  |  |  |  |  |  |  |  |  |  |  |  |  |  |  |  |  |  |  |  |  |  | |  |  |  |
| Underweight | 2.3  (-51.4, 56.0) | | 0.836 |  | 8.5  (-3.1, 20.1) | | 0.229 |  | 2.6  (-1.6, 6.9) | | 0.282 |  | 9.1  (-57.2, 75.3) | | 0.846 |  | -19.2  (-37.4, -1.0) | | 0.008 |  | -0.2  (-1.5, 1.0) | | 0.058 |  | 0.3  (-0.3,1.0) | | 0.094 |  | 0.1  (-0.1, 0.3) | | | 0.272 |  |
| Normal weight | Ref. | |  | Ref. | |  | Ref. | |  | Ref. | |  | Ref. | |  | Ref. | |  | Ref. | |  | Ref. | | |  |
| Overweight | -11.2  (-56.8, 34.3) | |  | 1.6  (-8.3, 11.4) | |  | 1.3  (-2.3, 4.9) | |  | -10.8  (-67.0, 45.4) | |  | 10.8  (-4.6, 26.2) | |  | -1.1  (-2.1, 0.0) | |  | -0.4  (-1.0, 0.2) | |  | -0.1  (-0.3, 0.1) | | |  |
| **Parental education** | |  |  |  |  |  |  |  |  |  |  |  |  |  |  |  |  |  |  |  |  |  |  |  |  |  |  |  |  | |  |  |  |
| Long | Ref. | | 0.268 |  | Ref. | | 0.009 |  | Ref. | | 0.058 |  | Ref. | | 0.476 |  | Ref. | | 0.166 |  | Ref. | | 0.567 |  | Ref. | | 0.303 |  | Ref. | | | <0.001 |  |
| Medium | -26.4  (-64.3, 11.4) | |  | -6.3  (-14.5, 1.8) | |  | -2.6  (-5.5, 0.2) | |  | 3.7  (-43.0, 50.4) | |  | 9.7  (-3.1, 22.5) | |  | 0.5  (-0.4, 1.4) | |  | -0.1  (-0.6, 0.4) | |  | -0.2  (-0.3, -0.1) | | |  |
| Short | -32.9  (-84.1, 18.4) | |  | -13.8  (-24.8, -2.7) | |  | -3.4  (-7.2, 0.5) | |  | 18.2  (-45.1, 81.4) | |  | 13.5  (-3.8, 30.9) | |  | 0.4  (-0.8, 1.6) | |  | 0.0  (-0.6, 0.7) | |  | -0.3  (-0.5, -0.1) | | |  |
| Unknown | -46.3  (-267.2, 174.5) | |  | 15.7  (-32.1, 63.5) | |  | -7.8  (-25.6, 9.9) | |  | 161.1  (-112.0, 434.2) | |  | 14.4  (-60.5, 89.4) | |  | 0.4  (-4.7, 5.5) | |  | 2.0  (-0.8, 4.7) | |  | -0.3  (-1.1, 0.5) | | |  |
| **Parental origin** |  |  |  |  |  |  |  |  |  |  |  |  |  |  |  |  |  |  |  |  |  |  |  |  |  |  |  |  |  | |  |  |  |
| Danish | Ref. | | 0.756 |  | Ref. | | <0.001 |  | Ref. | | 0.851 |  | Ref. | | 0.088 |  | Ref. | | 0.938 |  | Ref. | | <0.001 |  | Ref. | | 0.002 |  | Ref. | | | 0.667 |  |
| Non-Danish | 11.7  (-44.3, 67.8) | |  | -28.5  (-40.6, -16.4) | |  | 0.8  (-3.4, 5.0) | |  | 47.6  (-21.4, 116.6) | |  | -2.9  (-21.9, 16.0) | |  | -2.7  (-3.9, -1.4) | |  | 0.7  (0.0, 1.4) | |  | -0.1  (-0.3, 0.1) | | |  |
| Unknown | 57.3  (-148.5, 263.1) | |  | -20.8  (-65.3, 23.7) | |  | 5.7  (-29.6, 41.0) | |  | -145.1  (-398.8, 108.6) | |  | -2.9  (-72.6, 66.8) | |  | -1.2  (-6.0, 3.5) | |  | -2.7  (-5.2, -0.1) | |  | -0.2  (-0.9, 0.6) | | |  |
| **Residential area** | |  |  |  |  |  |  |  |  |  |  |  |  |  |  |  |  |  |  |  |  |  |  |  |  |  |  |  |  | |  |  |  |
| Urban | Ref. | | <0.001 |  | Ref. | | 0.027 |  | Ref. | | 0.375 |  | Ref. | | 0.313 |  | Ref. | | 0.121 |  | Ref. | | <0.001 |  | Ref. | | 0.003 |  | Ref. | | | 0.182 |  |
| Rural | -48.5  (-75.3, -21.7) | |  | 6.5  (0.7, 12.3) | |  | -1.0  (-3.1, 1.2) | |  | 17.0  (-16.1, 50.1) | |  | 7.2  (-1.9, 16.3) | |  | 1.2  (0.6, 1.8) | |  | 0.5  (0.2, 0.8) | |  | -0.1  (-0.2, 0.0) | | |  |
| Regression coefficients (β), 95% confidence intervals (CI), and *P*-values were derived from multivariable linear regression models examining the independent associations of sex, age, weight status, parental education level, country of origin, and residential area with intake of selected food groups and nutrients, as well as an overall dietary adherence score. aFish intake data were derived from the food frequency questionnaire, n=950 | | | | | | | | | | | | | | | | | | | | | | | | | | | | | | | | | |

| **Supplementary table 5.** Associations between sociodemographic characteristics and nutritional biomarkers among children with blood samples and complete data on parental education and ethnic origin | | | | | | | | | |
| --- | --- | --- | --- | --- | --- | --- | --- | --- | --- |
|  |  | Whole blood EPA+DHAa, FA% | | |  | Plasma total alkylresorcinolsb | | |  |
|  |  | β | 95% CI | P |  | β | 95% CI | P |  |
| **Sex** |  |  |  |  |  |  |  |  |  |
| Girls |  | Ref. | | 0.601 |  | Ref. | | 0.295 |  |
| Boys |  | -48 | -230, 133 |  | 1.09 | 0.93, 1.27 |  |
|  |  |  |  |  |  |  |  |  |  |
| **Age, y** |  | 147 | -3, 298 | 0.054 |  | 0.95 | 0.84, 1.08 | 0.462 |  |
|  |  |  |  |  |  |  |  |  |  |
| **Weight status** |  |  |  |  |  |  |  |  |  |
| Underweight |  | 17 | -379, 414 | 0.866 |  | 1.10 | 0.78, 1.55 | 0.663 |  |
| Normal weight |  | Ref. | |  | Ref. | |  |
| Overweight |  | 72 | -242, 385 |  | 1.09 | 0.83, 1.42 |  |
|  |  |  |  |  |  |  |  |  |  |
| **Parental education** |  |  |  |  |  |  |  |  |  |
| Long |  | Ref. | | 0.312 |  | Ref. | | 0.011 |  |
| Medium |  | -116 | -352, 119 |  | 0.82 | 0.67, 1.01 |  |
| Short |  | -204 | -565, 156 |  | 0.70 | 0.51, 0.97 |  |
|  |  |  |  |  |  |  |  |  |  |
| **Origin** |  |  |  |  |  |  |  |  |  |
| Danish |  | Ref. | | 0.344 |  | Ref. | | 0.745 |  |
| Non-Danish |  | 199 | -215, 613 |  | 0.94 | 0.66, 1.34 |  |
|  |  |  |  |  |  |  |  |  |  |
| **Residential area** |  |  |  |  |  |  |  |  |  |
| Urban |  | Ref. | | 0.002 |  | Ref. | | 0.273 |  |
| Rural |  | 337 | 123, 551 |  | 1.11 | 0.92, 1.34 |  |
| Regression coefficients (β), 95% confidence intervals (CI), and P-values were derived from multivariable linear regression models examining the independent associations of sex, age, weight status, parental education level, country of origin, and residential area with nutritional biomarkers of n-3 long-chain polyunsaturated fatty acids (fish) and wholegrain.  an=301  bn=296.Plasma total alkylresorcinols were log-transformed for analysis and all estimates were back transformed to the original scale for presentation. | | | | | | | | | |

Children consented
(n=1350)

Children excluded from analyses due to:

No completed food diaries (n=208)

Parent registered own food intake instead of child’s (n=1)

Extreme values of energy intake (EI >15 MJ or EI <2 MJ) (n=10)

Missing height and/or weight measurement (n=38)

Children included in cross-sectional study
(n=1094)

Eligible children invited to participate
(n=2006)

24 schools agreed to participate

496 schools invited

1 school withdrew

**Supplementary fig. 1**: Participant flow chart


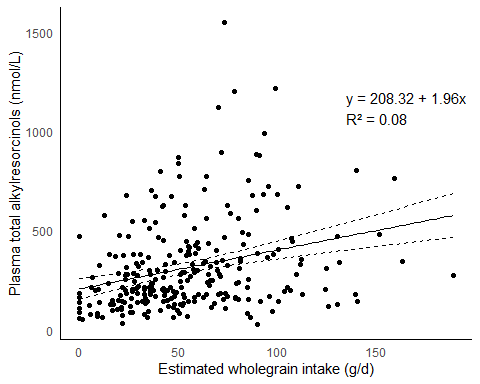


**Supplementary fig. 2.** Dose-response relationship between wholegrain intake and plasma total alkylresorcinols. The solid line represents the best-fitted regression line, and the dashed lines show the 95% confidence interval.


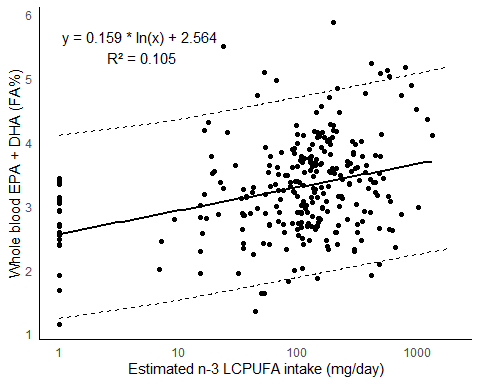


**Supplementary fig. 3.** Dose-response relationship between n-3 LCPUFA intake estimated by FFQ and whole blood EPA + DHA. The solid line represents the best-fitted regression line, and the dashed lines show the 95% confidence interval.
